# Supplementary material
Source: Springer Nature journal article supplement (https://www.springermedizin.de/resource/supplementary/12960_2013_380_MOESM2_ESM.pdf/9569986)
Supplement: MOESM2 [file 9569986]

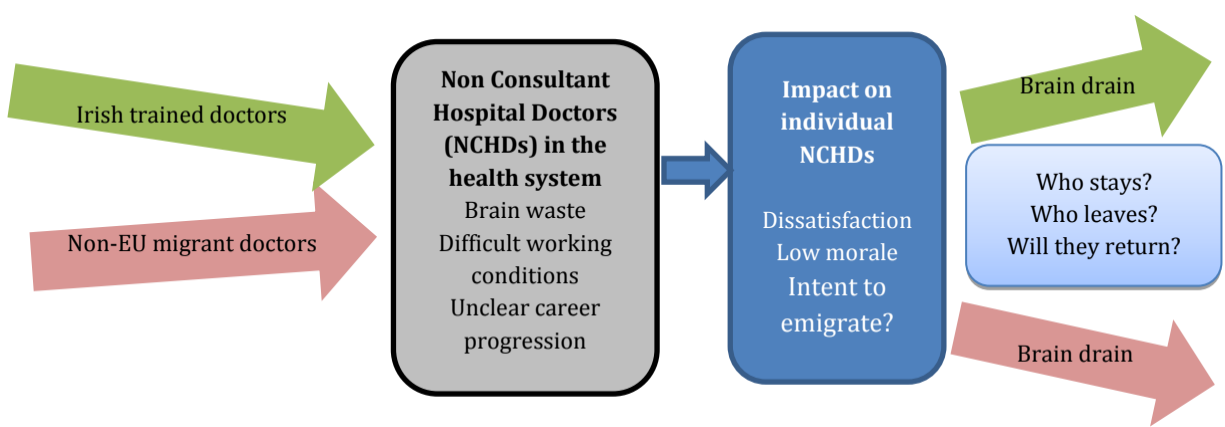

Irish trained doctors

Non-EU migrant doctors

**Non Consultant  
Hospital Doctors  
(NCHDs) in the  
health system**

Brain waste  
Difficult working  
conditions  
Unclear career  
progression

**Impact on  
individual  
NCHDs**

Dissatisfaction  
Low morale  
Intent to  
emigrate?

Brain drain

Who stays?  
Who leaves?  
Will they return?

Brain drain
